# Supplementary material
Source: PubMed Central journal article supplement (PMC5939215)
Supplement: figure_s1.pdf [file figure_s1.pdf]

# Figure S1

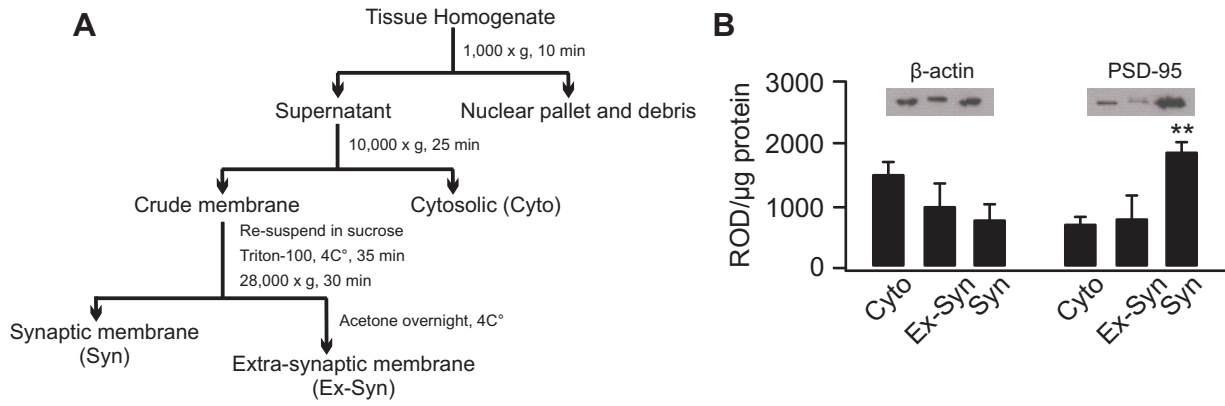

**Figure S1. Synaptic fraction is rich in PSD-95.**

- A.** Schematics of the tissue extraction protocol (also see Goebel-Goody et al 2009).
- B.** Normalized relative optical density (ROD) of PSD-95 (1:8000, Abcam) and  $\beta$ -actin expressions (per  $\mu$ g protein) in cytosolic, extra-synaptic and synaptic membrane fractions. \*\*  $p < 0.01$
